# Supplementary material for: AI-Enhanced Subseasonal Forecasting of Extreme Temperature Risks
Source: Research Square preprint supplement (doi:10.21203/rs.3.rs-7314380/v1), 2025-08-21
Supplement: Supplementary file 1 [file 4c52369e3cfa6b03acb992ce.pdf]

## **Supplementary information**

**Table S1** Model Feature for each prediction with DeepMet

| Predict variable | Time independent              |                                      | Time-dependent                                                                                              |                                 |
|------------------|-------------------------------|--------------------------------------|-------------------------------------------------------------------------------------------------------------|---------------------------------|
|                  | Geographic factors            | 2D features<br>(climatological data) | 2D Feature<br>(historical only)                                                                             | 3D feature<br>(historical only) |
| T2max            |                               |                                      | UWIND, VWIND, CFRAC, PBL, prep, Q2, RGRND, T2, WSPD10, WSTAR, HFX, LH, USTAR, ZRUF, PRSFC, WBAR, WR, SNOCOV | TA                              |
| T2min            | DLUSE, HT, LWMASK,            | LAI, VEG, ALBEDO, SWDNBC             |                                                                                                             | TA                              |
| Q2               | MSFX2, LUFRAC, PURB, LAT, LON |                                      |                                                                                                             | QC, QV, TA, CFRAC_3D            |
| WSPD10           |                               |                                      |                                                                                                             | UW, VW                          |

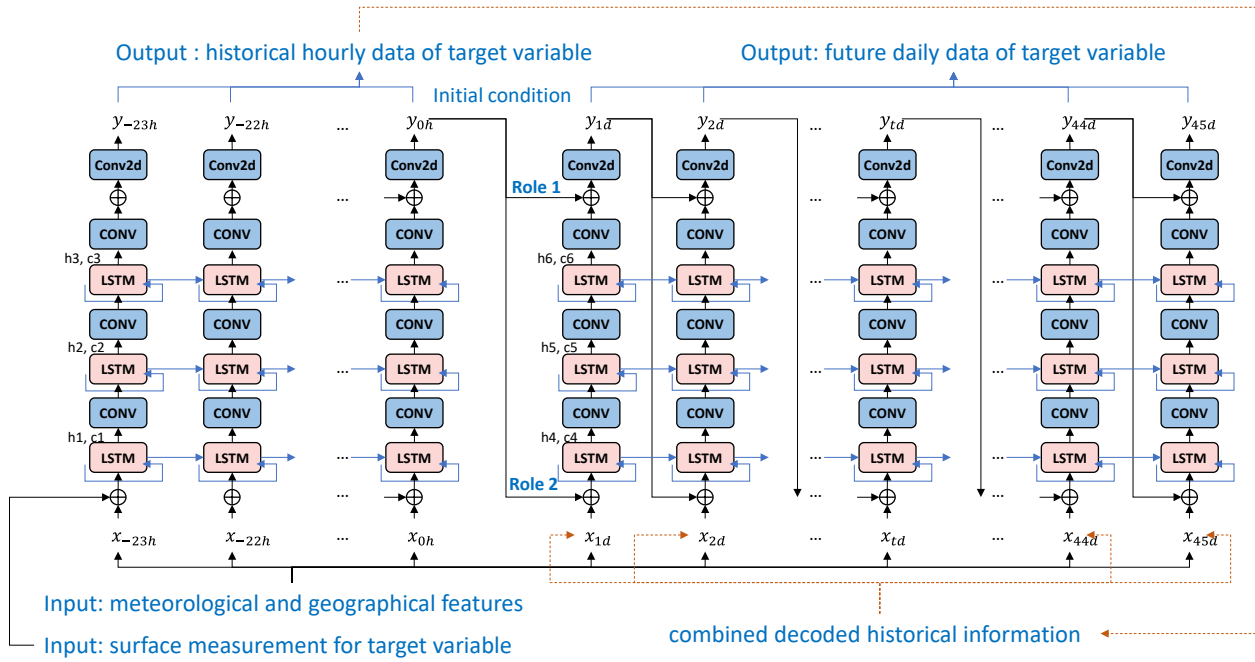

**Figure S1.** Model duo-ConvLSTM structure of DeepMet

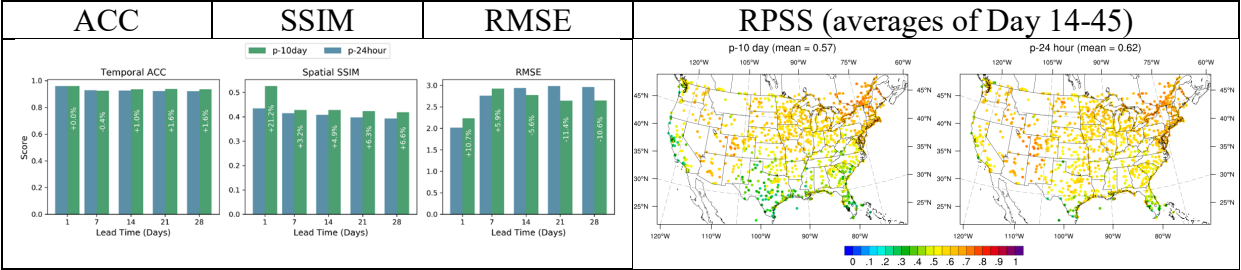

**Figure S2.** Comparison of DeepMet performance in predicting following days of T2 with 10-day historical window rather than previous 24 hours

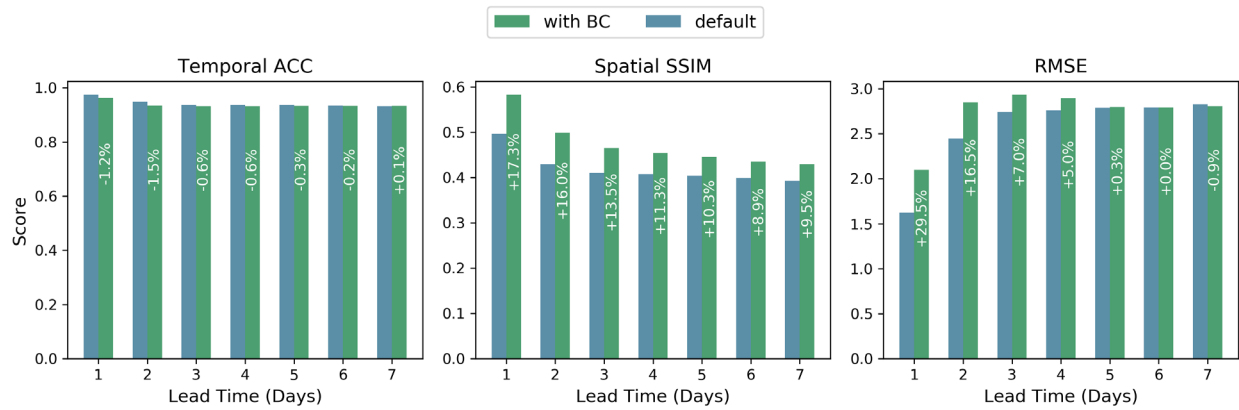

**Figure S3.** Comparison of DeepMet performance in forecasting 7-day T2 with and without boundary condition (BC) information. (Default refers to predictions without considering future BCs, while “With BC” incorporates BC information inferred from global model forecasts. Results indicate that including BCs notably improves prediction accuracy in the first 4 days, with diminishing impact for longer lead times; testing data for the whole year of 2023)

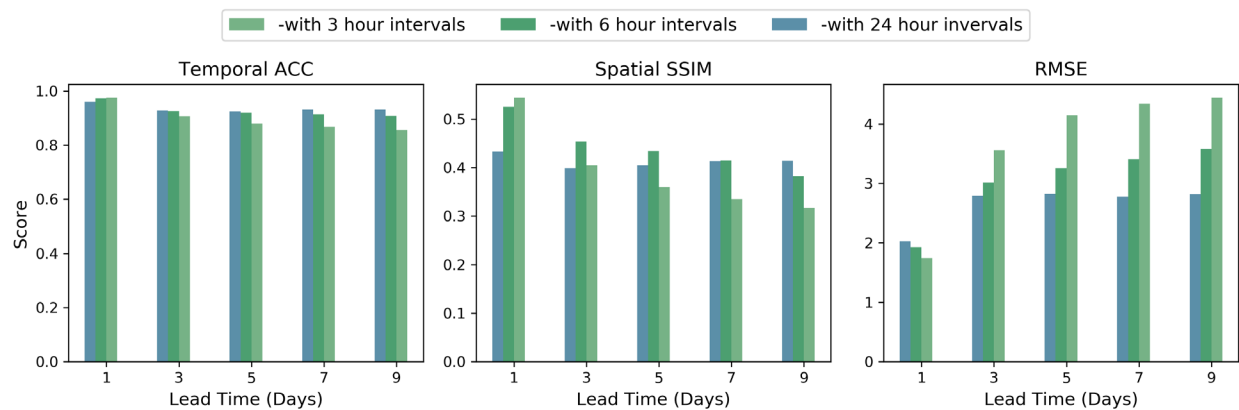

**Figure S4.** Comparison of DeepMet performance in predicting following days of T2 with different intervals by 3 hour, 6 hour and 24 hour

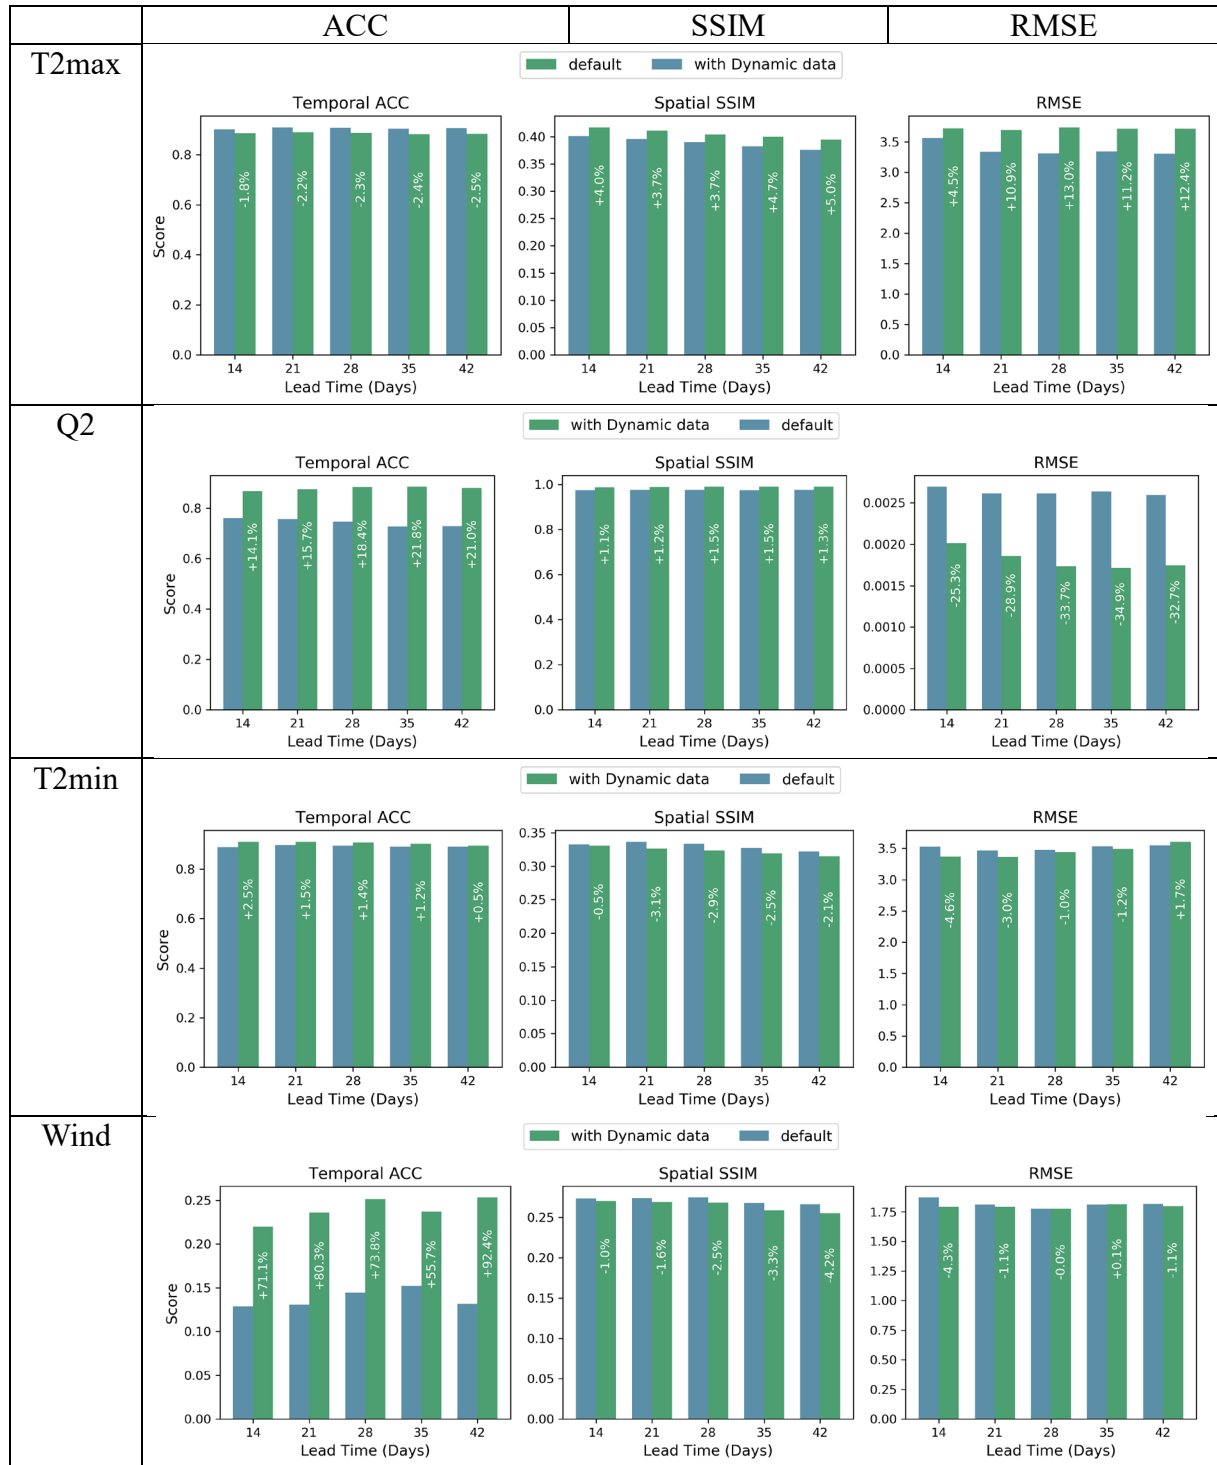

**Figure S5.** Comparison of DeepMet performance in predicting following days with T2 with better representations of time-series for slowly changing geophysical inputs (e.g., LAI, vegetation cover, albedo, downward shortwave radiation)

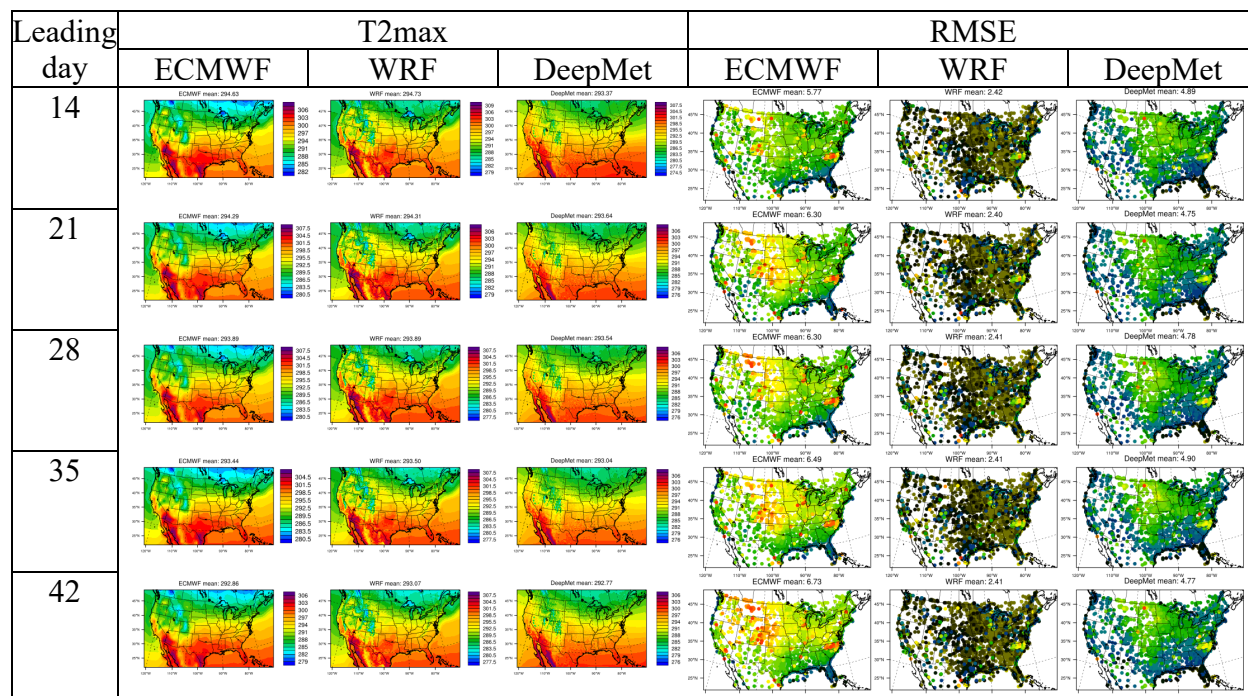

**Figure S6.** Comparison of ECMWF, WRF, and DeepMet prediction of T2max in following 14-42 days and their comparison with ground measurement from NCDC

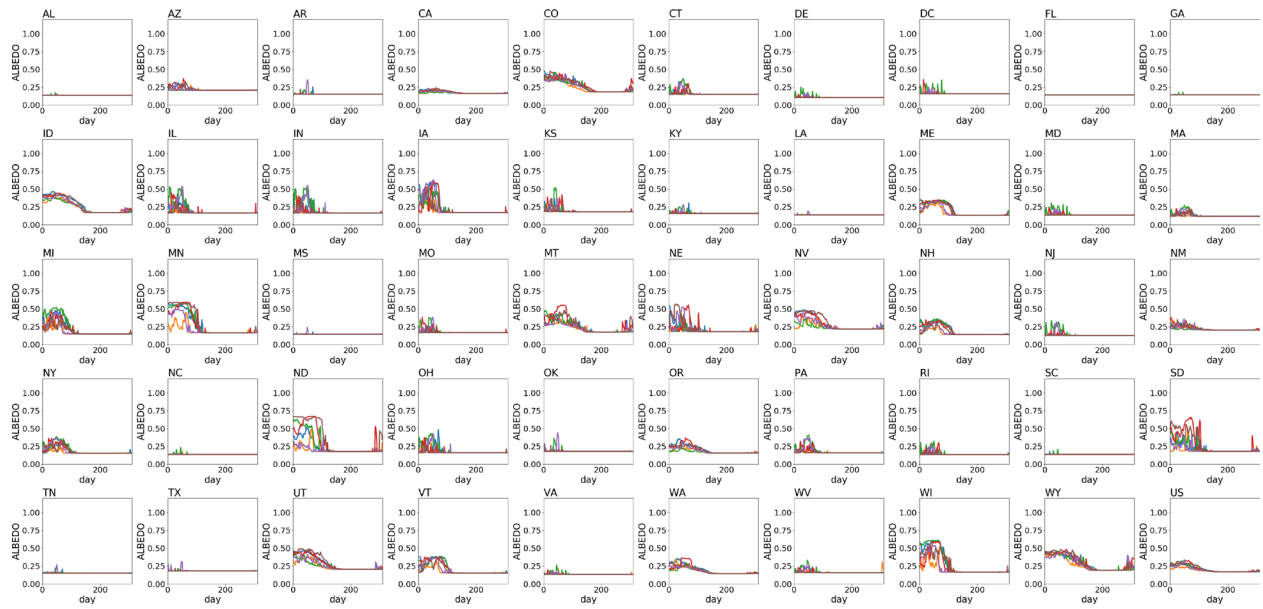

(a) albedo

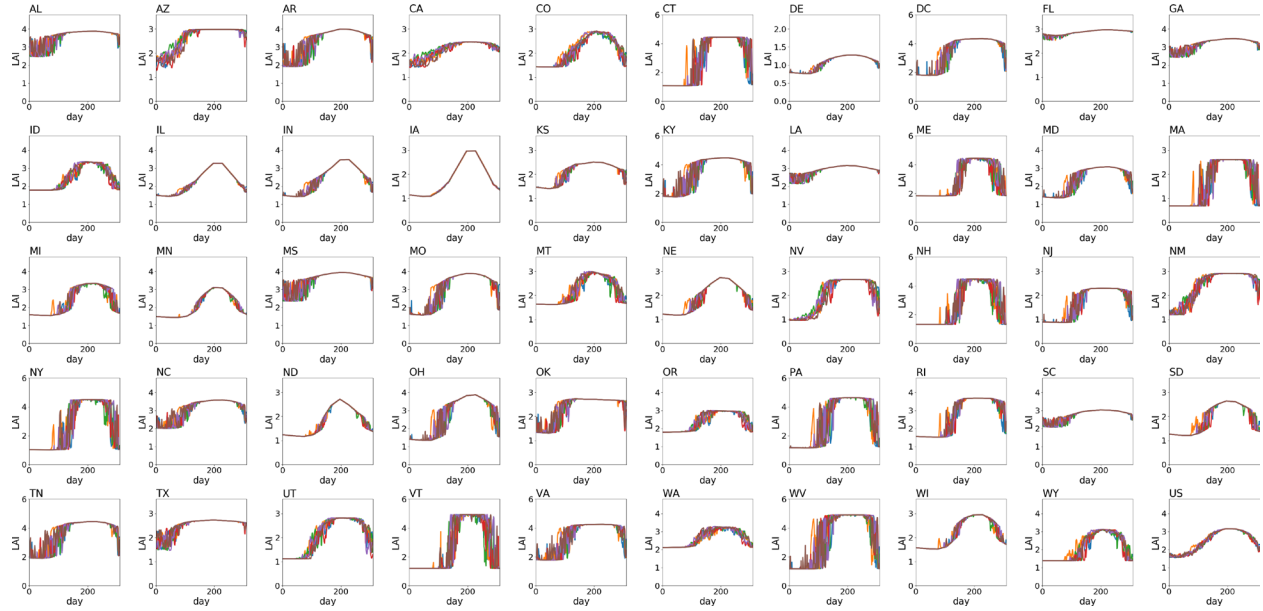

(b) LAI



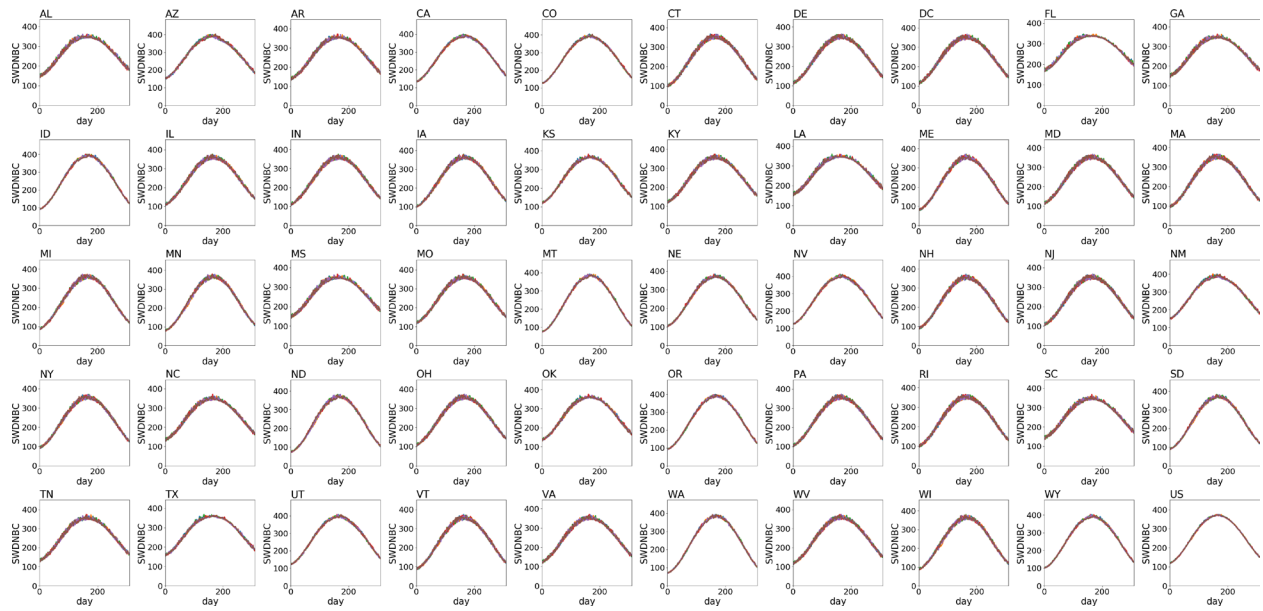

(c) SWDNBC

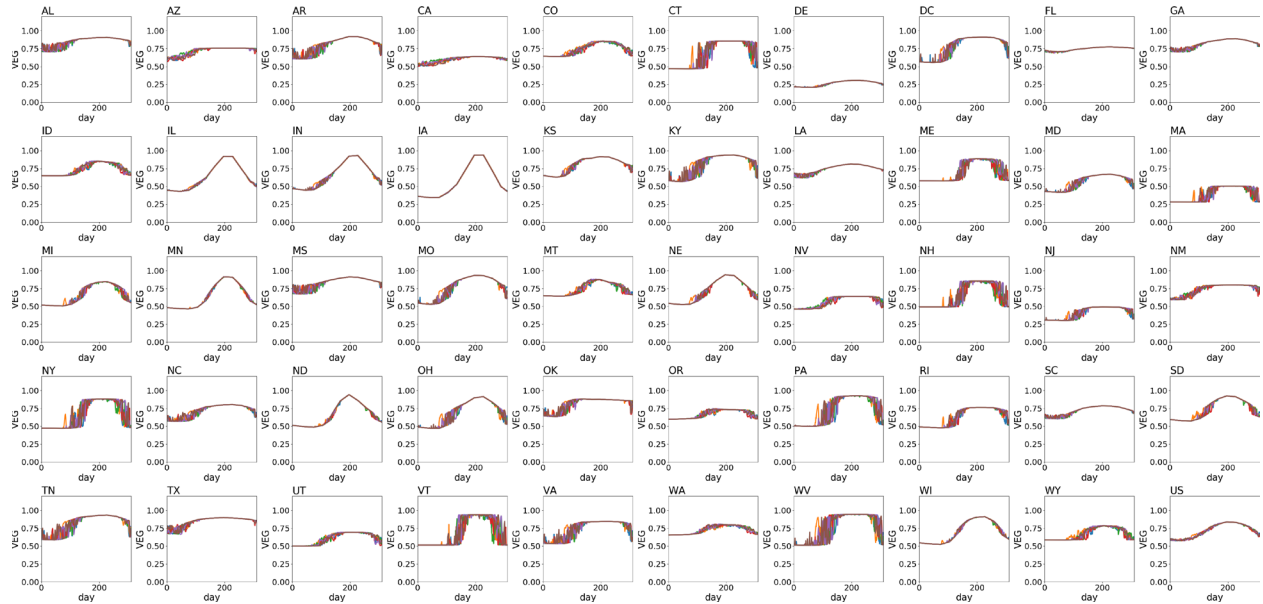

(d) VEG

**Figure S7.** Comparison of the daily-variation pattern of variables among years of 2008 (blue), 2012 (orange), 2014 (green), 2019 (red), 2021(purple), and 2023(brown)
